# Supplementary material for: Computerized clinical decision support systems for drug prescribing and management: A decision-maker-researcher partnership systematic review
Source: Implement Sci. 2011 Aug 3;6:89. doi: 10.1186/1748-5908-6-89 (PMC3179735; doi:10.1186/1748-5908-6-89)
Supplement: Additional file 1 — Study methods scores for trials of drug prescribing. Methods scores for the included studies. [file 1748-5908-6-89-S1.DOCX]

**Additional file 1, Table S1. Study methods scores for trials of drug prescribinga**

| **Study** | **Allocation concealedb** | **Cluster randomization** | **Adjustment for baseline differences** | **Objective outcome** | **Adequate follow-up** | **Total score** |
| --- | --- | --- | --- | --- | --- | --- |
| McDonald, 1976[89] | 0 | 0 | 0 | 2 | 0 | 2 |
| Coe, 1977[88] | 0 | 0 | 2 | 2 | 0 | 4 |
| McDonald, 1980[87] | 0 | 1 | 0 | 2 | 2 | 5 |
| McAlister, 1986[86] | 1 | 1 | 2 | 2 | 1 | 7 |
| Mazzuca, 1990[85] | 0 | 2 | 2 | 2 | 1 | 7 |
| Tierney, 1993[84] | 2 | 2 | 2 | 2 | 2 | 10 |
| Overhage, 1996[82] | 2 | 2 | 2 | 2 | 2 | 10 |
| Rotman, 1996[83] | 0 | 1 | 2 | 2 | 2 | 7 |
| Overhage, 1997[80] | 2 | 2 | 2 | 2 | 0 | 8 |
| Rossi, 1997[81] | 2 | 1 | 2 | 2 | 2 | 9 |
| Hetlevik, 1999[77-79] | 2 | 2 | 1 | 2 | 1 | 8 |
| Demakis, 2000[76] | 0 | 2 | 1 | 2 | 2 | 7 |
| Christakis, 2001[73] | 0 | 1 | 2 | 2 | 0 | 5 |
| Dexter, 2001[74] | 2 | 2 | 2 | 2 | 2 | 10 |
| McCowan, 2001[75] | 2 | 2 | 2 | 2 | 0 | 8 |
| Eccles, 2002[69, 64] | 2 | 2 | 2 | 2 | 2 | 10 |
| Flottorp, 2002[63, 70] | 2 | 2 | 2 | 2 | 1 | 9 |
| Lesourd, 2002[71] | 0 | 0 | 1 | 2 | 2 | 5 |
| Selker, 2002[72] | 2 | 0 | 2 | 2 | 2 | 8 |
| Ansari, 2003[61] | 0 | 1 | 2 | 2 | 2 | 7 |
| Filippi, 2003[62] | 0 | 1 | 2 | 2 | 2 | 7 |
| Tamblyn, 2003[65] | 0 | 1 | 2 | 2 | 2 | 7 |
| Tierney, 2003[66] | 2 | 2 | 2 | 2 | 2 | 10 |
| Weir, 2003[67] | 0 | 2 | 2 | 2 | 2 | 8 |
| Zanetti, 2003[68] | 2 | 0 | 2 | 2 | 2 | 8 |
| Krall, 2004[58] | 2 | 1 | 1 | 2 | 2 | 8 |
| Murray, 2004[60] | 0 | 1 | 2 | 2 | 0 | 5 |
| Cobos, 2005[49] | 2 | 2 | 2 | 2 | 2 | 10 |
| Derose, 2005[50] | 2 | 0 | 1 | 2 | 2 | 7 |
| Heidenreich, 2005[51] | 2 | 0 | 2 | 2 | 0 | 6 |
| Javitt, 2005[52] | 1 | 0 | 2 | 2 | 1 | 6 |
| Plaza, 2005[53] | 2 | 1 | 2 | 2 | 2 | 9 |
| Raebel, 2005[54] | 2 | 0 | 2 | 2 | 2 | 8 |
| Sequist, 2005[55] | 0 | 2 | 2 | 2 | 0 | 6 |
| Tierney, 2005[56] | 2 | 1 | 2 | 2 | 2 | 9 |
| Wolfenden, 2005[57] | 2 | 0 | 2 | 1 | 2 | 7 |
| Feldstein, 2006a [22, 41] | 2 | 2 | 2 | 2 | 2 | 10 |
| Feldstein, 2006b[40] | 2 | 0 | 2 | 2 | 2 | 8 |
| Judge, 2006[42] | 2 | 2 | 0 | 2 | 2 | 8 |
| Kattan, 2006[43] | 2 | 0 | 2 | 2 | 2 | 8 |
| Kuilboer, 2006[44] | 2 | 2 | 2 | 2 | 2 | 10 |
| Lester, 2006[45, 59] | 2 | 0 | 2 | 2 | 2 | 8 |
| Palen, 2006[47] | 2 | 1 | 2 | 2 | 2 | 9 |
| Paul, 2006[48] | 2 | 2 | 2 | 2 | 2 | 10 |
| Davis, 2007[32] | 2 | 1 | 2 | 2 | 2 | 9 |
| Heidenreich, 2007[33] | 2 | 0 | 2 | 2 | 1 | 7 |
| Martens, 2007[34, 46] | 2 | 2 | 2 | 2 | 1 | 9 |
| Peterson, 2007[35] | 0 | 0 | 0 | 2 | 2 | 4 |
| Raebel, 2007a[37] | 2 | 0 | 2 | 2 | 2 | 8 |
| Raebel, 2007b[36] | 2 | 0 | 1 | 2 | 2 | 7 |
| Thomson, 2007[38] | 2 | 0 | 2 | 2 | 2 | 8 |
| Verstappen, 2007[39] | 2 | 0 | 2 | 2 | 0 | 6 |
| Gurwitz, 2008[25] | 1 | 2 | 0 | 2 | 2 | 7 |
| Hicks, 2008[26] | 0 | 2 | 1 | 2 | 2 | 7 |
| Javitt, 2008[27] | 1 | 0 | 2 | 2 | 1 | 6 |
| Matheny, 2008[28] | 0 | 2 | 2 | 2 | 2 | 8 |
| Quinn, 2008[29] | 0 | 0 | 2 | 2 | 2 | 6 |
| Reeve, 2008[30] | 2 | 2 | 0 | 2 | 2 | 8 |
| Van Wyk, 2008[31] | 2 | 2 | 2 | 2 | 2 | 10 |
| Bertoni, 2009[16, 21] | 2 | 2 | 2 | 2 | 1 | 9 |
| Field, 2009[17, 24] | 0 | 2 | 1 | 2 | 2 | 7 |
| Fortuna, 2009[18] | 2 | 2 | 2 | 2 | 2 | 10 |
| Gilutz, 2009[19] | 0 | 2 | 1 | 2 | 2 | 7 |
| Lo, 2009[20] | 2 | 2 | 2 | 2 | 2 | 10 |
| Terrell, 2009[23] | 2 | 1 | 2 | 2 | 2 | 9 |

a Based on five individual items (score 2 = yes, 1 = partly, and 0 = no) and a summed total score (range 0 to 10). Because this review update included only randomized, controlled trials, the total score differs from that reported in the previous version of this review[2]: The item evaluating study type (randomized, quasi-randomized, or concurrent controls) has been replaced by one that evaluates use of concealed allocation (concealed, unclear, not concealed).

bIf allocation concealment is not readily apparent from the description provided in the published article, the primary author of the trial confirmed or indicated that allocation was concealed.
